# Supplementary material for: Translational research in health technologies: A scoping review
Source: Frontiers journal article supplement (doi:10.3389/fdgth.2022.957367), 2022-08-03
Supplement: Table_1.XLSX [file Table_1.XLSX]

## Sheet: Suplement2_Studies included
Ano	Title	Authors	Periodic Name	Type of Study	Origin Country
2022	Navigating the Regulatory Pathway for Medical Devices: a Conversation with the FDA, Clinicians, Researchers, and Industry Experts	Lottes, Aaron E, Cavanaugh, Kenneth J., Chan, Yvonne Yu Feng, Devlin, Vincent J., Goergen, Craig J., Jean, Ronald, Linnes, Jacqueline C., Malone, Misti, Peat, Raquel, Reuter, David G.	Journal of Cardiovascular Translational Research	Literature review and case study	USA
2022	IDEAL-D Framework for Device Innovation. A Consensus Statement on the Preclinical Stage	Hani J. Marcus, Christopher J. Payne, Archie Hughes-Hallett, Gauthier Gras, Konrad Leibrandt, Dipankar Nandi, DPhil,y, Guang-Zhong Yang	Annals of Surgery	Literature review	England
2022	Training the next generation of translational scientists: The Case Western Reserve University Translational Fellows Program	Cheryl L. Thompson, Tessianna A. Misko, Mark R. Chance	Journal of Clinical and Translational Science	Descriptive case study	USA
2021	A multidisciplinary approach to online support for device research translation: regulatory change and clinical engagement	Anne-Marie Miller a , Robert Behan a , h , Ian Smith b , Matthew Griffin c , Fionnuala Keane d , James Langan e , Colm O’Rourke f , Niall McAleenan g , Abhay Pandit h , Mark Watson	Health Policy and Technology	Descriptive case study	Ireland
2021	Enabling MedTech Translation in Academia: Redefining Value Proposition with Updated Regulations	Didier Letourneur, Kieran Joyce, Cédric Chauvierre, Yves Bayon, and Abhay Pandit	Adv. Healthcare Mater.	Narrative literature review	France
2020	Transforming the practice of medicine through team science.	Jason H. Pitzen, Heidi L. Dieter, Darren L. Gronseth, Amber K. Dahl, Venessa L. Boyle, Tharana Maran, C. Michel Harper Jr and Gregory J. Gores	Health Research Policy and Systems	Descriptive case study	USA
2020	Translational research in biomedical sciences in India: Challenges, observations & national perspectives	Rahmat Bano, Sushma Gupta; Chander Shekhar	Indian J Med Res	Descriptive case study	India
2019	Empowering translation of new ideas - A EIT HealthClinMed Summer School overview	Ribeiro, Sofia; Ricci, Mariachiara; Von Der Lieth, Albert; Bayon, Yves; Zeugolis, Dimitrios I.; Pelayo, Sylvia; Marque,Isabelle; Pazart, Lionel	Science and Technology Publications, Lda	Descriptive case study	France
2019	Point-of-Care Technology Research Network: An Evolving Model for Collaborative Translational Research in Biomedical Engineering	Penny Ford Carleton, Steve Schachter, Jue Chen, Todd Merchak, Tiffani Bailey Lash, Oliver Brand, Wilbur Lam, Greg Martin, Charlotte Gaydos, Yukari Manabe, Sally McFall, Robert Murphy, David McManus, Bryan Buchholz, John Parrish	Current Opinion in Biomedical Engineering	Descriptive case study	USA
2019	Making the Most of Innovation in Personalised Medicine: An UE Strategy for a Faster Bench to Bedside and Beyond Process	Denis Horgana and Jonathan A. Lalb	Public Health Genomics	Narrative literature review	Belgium
2019	A model for overcoming challenges in academic pediatric medical device innovation	Gwenyth A. Fischer; Sandra M. Wells; Jodi F. Rebuffoni; Brittni M. Peterson and ucker W. LeBien	Journal of Clinical and Translational Science	Literature review and case study	USA
2018	Developing Collaborative Platforms to Advance Neurotechnology and Its Translation	David A. Borton; Heather E. Dawes; Gregory A. Worrell; Philip A. Starr and Timothy J. Denison	Neuron	Narrative literature review	USA
2017	So, You Think You Have an Idea: A Practical Risk Reduction-Conceptual Model for Academic Translational Research	John Schwartz and Christopher Macomber	Bioengineering	Narrative literature review	USA
2017	Maximising value from a United Kingdom Biomedical Research Centre: study protocol	Trisha Greenhalgh; Pavel V. Ovseiko; Nick Fahy; Sara Shaw; Polly Kerr; Alexander D. Rushforth; Keith M. Channon; Vasiliki Kiparoglou	Health Research Policy and Systems	Descriptive case study	England
2017	Translating healthcare innovation from academia to industry	Mohammad Sanami; Tim Flood; Richard Hall; Fiona Kingscott; David Jayne and Peter Culmer	Advances in Mechanical Engineering	Descriptive case study	England
2017	Adapting the industrial stage-gate® process to create a novel master’s degree innovation curriculum	Angelika Domschke and John A. Blaho	Technology and Innovation,	Narrative literature review	USA
2016	Innovating in the medical device industry – challenges & opportunities ESB 2015 translational research symposium	Y. Bayon; M. Bohner; D. Eglin; P. Procter; R.G. Richards; J. Weber; D.I. Zeugolis	J Mater Sci: Mater Med	Anais	France
2016	Translation: The Gap in Scientific Advancements and Clinical Application.	Joseph S. Fernandez-Moure	Frontiers in Bioengineering and Biotechnology	Narrative literature review	USA
2016	Biomedical optics centers: forty years of multidisciplinary clinical translation for improving human health	Bruce J. Tromberg; R. Rox Anderson Reginald Birngruber; Ralf Brinkmann Michael W. Berns; John A. Parrish; Gabriela Apiou-Sbirlea	J. Biomed. Opt.	Multiple case study	USA
2016	Making the Leap: the Translation of Innovative Surgical Devices From the Laboratory to the Operating Room	Hani J. Marcus, MRCS,y Christopher J. Payne, PhD, Archie Hughes-Hallett, MRCS, Gauthier Gras, MRes, Konrad Leibrandt, MRes, Dipankar Nandi, DPhil,y and Guang-Zhong Yang, PhD	Annals of Surgery	Qualitative-quantitative study Narrative literature review	England
2015	Progressing innovation in biomaterials. From the bench to the bed of patients	Y. Bayon1; M. Bohner; D. Eglin; M. The ́rin; A. Montali; P. Procter; J. Fisher; R. G. Richards	J Mater Sci: Mater Med	Anais	France
2013	A New Model for Graduate Education and Innovation in Medical Technology	Youseph Yazdi and Soumyadipta Acharya	Annals of Biomedical Engineering,	Literature review and case study	USA
2013	Developing a New Model for the Invention and Translation of Neurotechnologies in Academic Neurosurgery	Eric C. Leuthardt, MD	Neurosurgery	Case study	USA
2013	Advancing Neurosurgery Through Translational Research	Claire Lacey and Garnette Sutherland	Neurosurgery	Case study	Canada
2012	The “Need to Knowledge” Model: An operational framework for knowledge translation and technology transfer	Joseph P. Lane	Technology and Disability	Narrative literature review	USA
2012	The New (Challenging) Role of Academia in Biomaterial Translational Research and Medical Device Development	Kyle Kleinbeck, Edward Anderson, Matthew Ogle, et al.	Biointerphases	Narrative literature review	EUA
2011	Support for Investigator-Initiated Clinical Research Involving Investigational Drugs or Devices: The Clinical and Translational Science Award Experience	Marlene Berro, Bruce K. Burnett, Gregg J. Fromell, Karen A. Hartman, Eric P. Rubinstein, JD Kathryn G. Schuff and Lisa A. Speicher,	Clinical Research	Qualitative research	USA
2011	Close to the bench as well as at the bedside involving service users in all phases of translational research	Felicity Callard; Diana Rose; and Til Wykes	Health Expectations	Narrative literature review	England
2010	Medical device development in crisis: A movement for technology innovation in health and medicine in Japan	Shinya Numata, Shinobu Oguchi, Yuji Yamamoto, Hiroo Imura & Koji Kawakami	Innovation Management, Policy & Practice	Revisão da literatura e Pesquisa Qualitativa	Japan
2010	Academic/Industry Challenges for Medical Device Development	John H. Linehan and Ari Chaney	Sci. Transl. Med	Narrative literature review	USA
2010	Translating three states of knowledge–discovery, invention, and innovation	Joseph P. Lane	Implementation Science	Narrative literature review	USA
2010	Successfully Accelerating Translational Research at an Academic Medical Center: The University of Michigan-Coulter Translational Research Partnership Program	Kenneth J. Pienta, M.D.	CTS Journal	Narrative literature review	USA
2010	Translation to success of surgical innovation	Joshua A. Vecht, Ludwig Karl von Segesser, Hutan Ashrafian, Christopher Rao, Petros Skapinakis, Srdjan Saso, Ara Darzi, Thanos Athanasiou	European Journal of Cardio-thoracic Surgery	Narrative literature review	England

## Sheet: Quadro
Autor	Analisam Programa Institucional de suporte a TR	Base Conceitual	Modelo Metodológico	Programa de Formação e Treinamento	Proposta de abordagem ou modelo conceitual	Análise de aspectos relevantes ou boas práticas em TR	Destaque
Anne-Marie Miller				x
Pitzen et al, 2020	Programa Mayo Clinic	Ciência da Implementação
Ribeiro etal, 2019			Híbrido (e-learning e imersão clínica)	Programa de Treinamento Clinmed of EIT Health
Carleton et al, 2019	POCTRN do NIH (Rede de Desenvolvimento de Tecnologias Point of Care)						Foco Atenção Primária
SCHWartz, 2017					X
Yazdi, 2013			Imersão Clínica	Programa de Mestrado
Greenhagh, 2017	NIHR Osford Biomedical Research Centre	Tríplice Hélice, Producão de Conhecimento e Co-criação de valor
Sanami, 2017		Gartner Hype Cicle			X
Numata, 2010						X	Japão
Horgana, 2019						X	UE
Berro, 2011	Centros Acadêmicos de Saúde (CTSA- AHCs)
BAyon 1						X
Bayon2					x
Domschke		Processo Industrial Stage-gate		Mestrado
Moure						X
Linehan						X
Lane 1		KTA a NKT			X
Fischer	PDIC (Consórcio de Inovação em Dispositivos Pediátricos)
Borton			Ecossistemas que congregam varias ferramentas		X
Tromberg						X	3 Centros de Biofotonica e optica biomédica
Marcus						X	Analise de mais 8 mil artigos
Leuthardt	Modelo do Centro de Invação em neurociencia e Tecnologias da Universidade de Washington (CINT)
Letourneur						X	Nova Regulação de MD da UE (Matriz Swot)
Callard		Dimesões científica, ética e pragmatica			X
Kleinbeck					X		Roteiro de desenvolvimento
Pienta	Modelo Universidade de Michigan em parceria com o Wallace Coulter Foundation						Baseado em riscos
Bano						X	India
Vecht						X
Lacey		Tradução orientada pelo investigador ou pela industria				X	Alguns produtos não se encaixam no padrão de TR em razão de sua importância global e tem que contar com outras estrategias para serem acessiveis aos pacientes
Lane2		modelo Necessidade de Conhecimento (NtK) e KTA			X

## Sheet: Figure1_Classification
Authors	Year	Institutional Program to Support	Training Program	Proposed approach or conceptual model	Analysis of relevant aspects or good practices
Lottes, Aaron E, Cavanaugh, Kenneth J., Chan, Yvonne Yu Feng, Devlin, Vincent J., Goergen, Craig J., Jean, Ronald, Linnes, Jacqueline C., Malone, Misti, Peat, Raquel, Reuter, David G.	2022
Hani J. Marcus, Christopher J. Payne, Archie Hughes-Hallett, Gauthier Gras, Konrad Leibrandt, Dipankar Nandi, DPhil,y, Guang-Zhong Yang	2022
Cheryl L. Thompson, Tessianna A. Misko, Mark R. Chance	2022
Anne-Marie Miller a , Robert Behan a , h , Ian Smith b , Matthew Griffin c , Fionnuala Keane d , James Langan e , Colm O’Rourke f , Niall McAleenan g , Abhay Pandit h , Mark Watson	2021
Didier Letourneur, Kieran Joyce, Cédric Chauvierre, Yves Bayon, and Abhay Pandit	2021
Jason H. Pitzen, Heidi L. Dieter, Darren L. Gronseth, Amber K. Dahl, Venessa L. Boyle, Tharana Maran, C. Michel Harper Jr and Gregory J. Gores	2020
Rahmat Bano, Sushma Gupta; Chander Shekhar	2020
Ribeiro, Sofia; Ricci, Mariachiara; Von Der Lieth, Albert; Bayon, Yves; Zeugolis, Dimitrios I.; Pelayo, Sylvia; Marque,Isabelle; Pazart, Lionel	2019
Penny Ford Carleton, Steve Schachter, Jue Chen, Todd Merchak, Tiffani Bailey Lash, Oliver Brand, Wilbur Lam, Greg Martin, Charlotte Gaydos, Yukari Manabe, Sally McFall, Robert Murphy, David McManus, Bryan Buchholz, John Parrish	2019
Denis Horgana and Jonathan A. Lalb	2019
Gwenyth A. Fischer; Sandra M. Wells; Jodi F. Rebuffoni; Brittni M. Peterson and ucker W. LeBien	2019
David A. Borton; Heather E. Dawes; Gregory A. Worrell; Philip A. Starr and Timothy J. Denison	2018
John Schwartz and Christopher Macomber	2017
Trisha Greenhalgh; Pavel V. Ovseiko; Nick Fahy; Sara Shaw; Polly Kerr; Alexander D. Rushforth; Keith M. Channon; Vasiliki Kiparoglou	2017
Mohammad Sanami; Tim Flood; Richard Hall; Fiona Kingscott; David Jayne and Peter Culmer	2017
Angelika Domschke and John A. Blaho	2017
Y. Bayon; M. Bohner; D. Eglin; P. Procter; R.G. Richards; J. Weber; D.I. Zeugolis	2016
Joseph S. Fernandez-Moure	2016
Bruce J. Tromberg; R. Rox Anderson Reginald Birngruber; Ralf Brinkmann Michael W. Berns; John A. Parrish; Gabriela Apiou-Sbirlea	2016
Hani J. Marcus, MRCS,y Christopher J. Payne, PhD, Archie Hughes-Hallett, MRCS, Gauthier Gras, MRes, Konrad Leibrandt, MRes, Dipankar Nandi, DPhil,y and Guang-Zhong Yang, PhD	2016
Y. Bayon1; M. Bohner; D. Eglin; M. The ́rin; A. Montali; P. Procter; J. Fisher; R. G. Richards	2015
Youseph Yazdi and Soumyadipta Acharya	2013
Eric C. Leuthardt, MD	2013
Claire Lacey and Garnette Sutherland	2013
Kyle Kleinbeck, Edward Anderson, Matthew Ogle, et al.	2012
Joseph P. Lane	2012
Marlene Berro, Bruce K. Burnett, Gregg J. Fromell, Karen A. Hartman, Eric P. Rubinstein, JD Kathryn G. Schuff and Lisa A. Speicher,	2011
Felicity Callard; Diana Rose; and Til Wykes	2011
Shinya Numata, Shinobu Oguchi, Yuji Yamamoto, Hiroo Imura & Koji Kawakami	2010
John H. Linehan and Ari Chaney	2010
Joseph P. Lane	2010
Kenneth J. Pienta, M.D.	2010
Joshua A. Vecht, Ludwig Karl von Segesser, Hutan Ashrafian, Christopher Rao, Petros Skapinakis, Srdjan Saso, Ara Darzi, Thanos Athanasiou	2010
Figure 1: Classification of the included articles, by object of study
Analysis of relevant aspects or good practices	12
Proposed approach or conceptual model	9
Institutional Program to Support	7
Training Program	5
