# Supplementary material for: Translational research in health technologies: A scoping review
Source: Frontiers journal article supplement (doi:10.3389/fdgth.2022.957367), 2022-08-03
Supplement: Table_2.XLSX [file Table_2.XLSX]

## Sheet: Table1
Table 1: Incidence of themes related to the attributes of translational research grouped by dimension
Dimension: Knowledge	Incidence	Lottes	Marcus	Thompson	Miller	Pitzer	Letourneur	Bano	Sofia	Carleton	Horgana	Fischer1	Borton	Schwartz	Pavel V	Sanami1	Domschke1	Bayon 1	Joseph S	Bruce J	Hani J	Bayon2	Yazdi	Eric C	Lacey	Joseph P	Kleinbeck	Berro	Callard	Numata	Joseph P.	Linehan	Pienta	Vecht
	N (%)																														Lane
Knowledge of technical regulations (technical standards)	28 (85%)	x	x	x		x	x	x	x	x	x		x	x		x	x		x	x	x	x	x	x	x	x	x	x	x	x	x	x	x
Health regulatory knowledge (safety and efficacy)	27 (82%)	x	x	x	x	x	x	x	x	x	x	x	x	x		x	x	x	x		x	x	x	x	x		x	x	x	x		x
Knowledge about the design and conduct of validation testing, safety, pre-clinical and clinical trials	25 (75%)	x	x		x	x	x	x	x	x	x		x	x	x	x		x	x	x	x	x		x	x		x	x	x	x		x
Knowledge of Health Economics and Health Technology Assessment - HTA (cost effectiveness, budgetary impact, payment and reimbursement issues, system organization and parameters adopted for the incorporation of technologies)	22 (66%)	x	x			x	x	x	x		x	x	x	x	x	x	x	x						x			x	x	x	x	x	x	x
Knowledge of regulatory ethics	20 (60%)		x		x	x	x	x		x	x	x	x		x			x		x	x				x			x	x	x	x		x	x
Knowledge of intellectual protection and asset management	21 (63%)	x	x	x	x	x	x	x	x	x	x	x	x	x	x		x	x				x	x		x		x		x
Knowledge of the conceptual model of the disease, problem area, workflow or process (Lines of Care, Protocols, Guidelines and Directions from Medical Societies)	18 (54%)	x				x	x	x	x	x	x	x	x	x	x	x				x			x	x		x	x	x
Product Lifecycle	16 (48%)	x		x	x				x	x	x			x		x								x			x	x	x		x	x	x	x
Product design	12 (36%)	x	x	x	x				x	x	x					x	x						x	x			x
Dimensions: Capacity	Incidence
	N (%)
Collaborative efforts that blend scientific and technological responses with clinical need	31 (94%)	x			x	x	x	x	x	x	x	x	x	x	x	x	x	x	x	x	x	x	x	x	x	x	x	x	x	x	x	x	x	x
Attention to unmet clinical needs. "Does my innovation solve/address a valuable unmet need or problem?"	23 (70%)	x	x			x	x	x	x	x	x		x	x	x		x	x		x			x	x		x	x	x	x	x	x	x	x
Evaluation of the technical, clinical and economic feasibility of the innovation, compared to an existing product or process	22 (69%)	x	x	x		x		x	x	x	x		x	x	x	x	x	x		x	x	x	x		x	x	x				x
Identification of promising technologies, at the frontier of knowledge and/or more cost effective	19 (58%)	x				x	x	x	x	x	x	x		x		x		x	x	x						x	x		x		x		x	x
Generating value in health. Transforming discoveries into innovations with social impact	19 (58%)			x	x	x	x	x	x	x	x			x		x			x		x	x					x	x	x		x	x		x
Assessment of the technology's market potential and business plan	21 (64%)	x	x	x	x	x	x	x	x	x	x	x	x	x	x	x	x	x						x	x	x	x
Effective communication with different stakeholders	19 (58%)	x	x			x	x	x	x	x	x	x		x	x	x	x	x							x	x	x	x		x
Tolerance to error and risk	15 (45%)	x	x			x	x	x	x	x	x		x	x			x			x				x			x							x
Use of tools and methodologies capable of anticipating obstacles from discovery to translation (translational readiness level assessment-TRL, project and risk management)	14 (42%)	x	x			x	x	x	x	x	x		x		x			x	x						x							x
Analysis of the technology's framework in the risk class to identify technical and sanitary regulations and requirements	14 (42%)	x	x				x	x	x	x	x						x		x	x		x	x	x			x
Documentation of the innovation project with milestones, timeline, requirements, and available resources	10 (30%)	x			x	x	x		x	x	x			x													x	x
Attention to product usability in the early stages, in order to increase the chances of success and to enable timely reorientation in development	9 (27%)	x	x			x	x	x	x	x	x								x
Entrepreneurship	4 (12%)			x			x		x		x
Creativity	4 (12%)			x	x	x				x
Dimension: institutional or inter-institutional structure	Incidence
	(n - %)
Interdisciplinary and Transdisciplinary Teams	31 (94%)	x			x	x	x	x	x	x	x	x	x	x	x	x	x	x	x	x	x	x	x	x	x	x	x	x	x	x	x	x	x	x
Collaborative or networked action linking multiple researchers and research centers and government to create synergies and leverage complementary strengths	28 (85%)	x			x	x	x	x	x	x	x	x	x	x	x	x	x	x	x	x	x	x	x	x	x	x	x	x	x	x		x
Developing partnerships with industry to maximize innovation opportunities that enable co-development and leverage research funding	21 (64%)	x			x	x	x	x	x	x	x	x	x	x	x	x		x	x	x	x		x		x	x	x
Education and Training on pertinent topics and with appropriate educational resources	22 (66%)	x	x	x	x	x	x	x	x	x	x			x	x		x	x	x				x	x			x	x			x	x		x
Support to researchers in project management, monitoring and evaluation	20 (60%)	x		x		x	x	x	x	x	x	x	x	x		x		x	x				x	x		x	x	x	x	x
Support about available funding (Governmental agencies and non-governmental entities)	18 (54%)			x		x	x	x		x	x			x	x	x			x						x		x	x	x	x	x	x	x
Strategic and risk management support	15 (45%)	x				x	x	x	x	x	x		x	x			x						x			x	x	x				x
Administrative, legal and/or regulatory support	14 (42%)			x	x	x	x		x	x	x		x	x									x		x		x	x						x
Prototyping in industrial design based on clinical and user needs assessment	14 (42%)	x	x		x		x		x	x	x	x	x				x			x		x	x			x
Proof of concept, prototype and in vitro testing capabilities	13 (39%)	x	x			x	x		x	x				x	x				x							x		x	x			x	x
Mentoring and supervision	11 (33%)			x			x		x	x				x					x				x					x			x	x		x
Adoption of business and marketing strategies	11 (33%)	x		x			x		x	x	x				x							x				x						x	x	x
Opportunity for start-up creation, technology transfer or licensing	10 (30%)	x		x			x	x	x	x	x			x									x			x
Adoption of good laboratory practices (GLP) and quality management	7 (21%)		x				x	x	x	x	x											x
In-house or collaborative clinical research infrastructure	6 (18%)	x			x	x	x	x		x
Engaging institutional leaders to remove technical and administrative barriers	6 (18%)			x		x	x		x		x															x

## Sheet: Table2
Table 2: Incidence of the barriers pointed out as determinant to be faced by academic laboratories in the implementation of translational research, from the analysis dimension
Barriers	Dimension			Incidence	Lottes	Marcus	Thompson	Miller	Pitzer	Letourneur	Bano	Sofia	Carleton	Horgana	Fischer1	Borton	Schwartz	Pavel V	Sanami1	Domschke1	Bayon 1	Joseph S	Bruce J	Hani J	Bayon1	YAZDI	Eric C	Lacey	Joseph P	Kleinbeck	Berro	Callard	Numata	Joseph P.	Linehan	Pienta	Vecht
				N (%)																														Lane
	Conteúdo	Habilidade	Estrutura Institucional
	Knowledge	Capacity	Institutional Structure
Staff not trained in regulatory and technical requirements and reimbursement and intellectual property issues	X			24 (73%)	x	x	x	x	x	x	x	x		x		x	x		x			x	x	x		x	x		x		x	x	x	x		x	x
Lack of institutional support for the teams			X	21 (64%)	x		x	x	x	x	x	x		x	x	x		x	x	x		x								x	x	x	x	x		x	x
Inadequate funding			X	20 (60%)			x		x	x	x	x		x	x	x						x	x				x	x	x	x	x	x	x	x		x	x
Institutional model and public policies based on disciplines and linear innovation process			X	19 (57%)				x		x	x	x	x		x	x	x		x		x	x							x	x	x	x	x	x	x	x
Difficulty in the interaction of academia with industry and society		X	X	18 (54%)	x			x	x	x	x	x		x	x	x	x		x			x					x			x			x	x	x		x
Difficulty in communication that facilitates the most effective "translation" of academic project concepts into viable clinical solutions		X	X	16 (48%)	x	x		x		x	x	x		x		x			x			x							x	x			x	x	x		x
Researcher training programs that do not address requirements and fundamental knowledge and skills for the health research translational process	X	X		15 (45%)	x	x	x	x		x	x	x		x	x							x				x			x	x	x				x
High cost of the research translation process and patent maintenance			X	11 (33%)	x				x	x	x	x				x									x		x			x						x	x
Long time to complete the entire translation process	X	X	X	12 (36%)	x	x					x					x						x		x					x			x		x	x	x	x
Lack of interest from industry			X	5 (15%)	x							x																		x			x		x
Lack of agility in the university's administrative processes			X	3 (9%)			x																										x		x

## Sheet: Table3
Table 3: Incidence of factors indicated as determinants for favoring the implementation of translational research, from the dimension of analysis
Factors	Dimension			Incidence	Lotter	Marcus	Thompsn	Miller	Pitzer	Letourneur	Bano	Sofia	Carleton	Horgana	Fischer1	Borton	Schwartz	Pavel V	Sanami1	Domschke1	Bayon 1	Joseph S	Bruce J	Hani J	Bayon1	YAZDI	Eric C	Lacey	Joseph P	Kleinbeck	Berro	Callard	Numata	Lane	Linehan	Pienta	Vecht
				N (%)																														Lane
	Knowledge	Capacity	Institutional Structure
Multidisciplinary, collaborative, and networked teamwork		X	X	31 (94%)	x			x	x	x	x	x	x	x	x	x	x	x	x	x	x	x	x	x	x	x	x	x	x	x	x	x	x	x	x	x	x
Team knowledge of technical and regulatory requirements	X			28 (85%)	x	x	x	x	x	x	x	x	x	x		x	x	x		x	x	x		x	x	x	x	x		x	x	x	x	x	x		x
Cooperation with the industry			X	24 (73%)	x			x	x	x	x	x	x	x	x	x	x	x	x	x	x	x		x		x	x	x	x		x
Qualified and effective communication between the actors involved		X	X	21 (64%)	x	x		x	x	x	x	x	x		x	x	x	x	x	x	x	x									x	x	x	x	x
Valuing the patient's and technology user's perspective		X	X	19 (57%)	x	x		x		x	x	x	x	x	x	x	x		x		x				x	x	x				x	x				x
Clinical immersion to identify and assess unmet clinical problems and needss		X	X	14 (46%)	x			x		x	x	x	x	x	x	x	x	x		x		x	x	x
Offering regular funding to maintain the team			X	14 (46%)			x		x	x	x		x					x	x	x		x				x		x	x		x				x
Changing the paradigm of researcher training			X	14 (46%)	x	x		x		x			x	x			x				x	x				x						x		x	x	x
Selection of Projects with high translation potential		X	X	14 (46%)	x	x			x	x	x	x		x		x		x		x	x											x			x	x
Project Management		X	X	14 (46%)	x	x	x		x	x	x	x	x	x						x							x				x				x	x
Alignment of innovation with institutional and local priorities			X	10 (30%)	x			x	x	x	x	x	x	x		x		x
Transparency with the aim of improving research quality and avoiding duplication of effort			X	5 (15%)		x			x	x		x	x
Sustainability (effective technologies developed for low-resource environments)	X	X	X	4 (12%)			x			x		x														x
